# Supplementary material
Source: PubMed Central journal article supplement (PMC8409154)
Supplement: NIHMS1732118-supplement-Supp1.pdf [file NIHMS1732118-supplement-Supp1.pdf]

**Table S1:** Multivariate Logistic Model for Patients Undergoing Endocrine Treatment Without Ovarian Ablation (Group 1 and Group 2:  $n=2224$ ) versus With Ovarian Ablation (Group 3 and Group 4:  $n=516$ ).

| <b>Variables</b>      | <b>Levels</b>                              | <b>OR</b> | <b>95% CI<br/>Lower<br/>Bounds</b> | <b>95% CI<br/>Upper<br/>Bounds</b> | <b><i>p</i>-value</b> |
|-----------------------|--------------------------------------------|-----------|------------------------------------|------------------------------------|-----------------------|
| Age at Diagnosis      | as 1 yr increase                           | 0.988     | 0.971                              | 1.006                              | 0.181                 |
| Year of Diagnosis     | 2011 vs 2010                               | 0.979     | 0.677                              | 1.416                              | <b>0.037</b>          |
|                       | 2012 vs 2010                               | 1.128     | 0.780                              | 1.631                              |                       |
|                       | 2013 vs 2010                               | 1.081     | 0.761                              | 1.538                              |                       |
|                       | 2014 vs 2010                               | 1.577     | 1.109                              | 2.242                              |                       |
| Histology             | Lobular no ductal vs<br>Ductal no lobular  | 1.409     | 0.902                              | 2.201                              | 0.085                 |
|                       | Lobular and ductal<br>vs Ductal no lobular | 0.955     | 0.625                              | 1.46                               |                       |
|                       | Inflammatory vs<br>Ductal no lobular       | 0.646     | 0.162                              | 2.571                              |                       |
|                       | Other vs Ductal no<br>lobular              | 0.253     | 0.078                              | 0.823                              |                       |
|                       | Grade (219 unk.)                           | G2 vs G1  | 1.917                              | 1.053                              |                       |
|                       | G3 vs G1                                   | 2.037     | 1.136                              | 3.652                              |                       |
| LN Pos Exact (3 unk.) | Yes vs. No                                 | 1.178     | 0.799                              | 1.739                              | 0.408                 |
| Stage (210 unk.)      | II vs. I                                   | 1.226     | 0.846                              | 1.778                              | <b>&lt;0.001</b>      |
|                       | III vs. I                                  | 2.259     | 1.372                              | 3.72                               |                       |
| Chemotherapy          | Yes vs. No                                 | 0.969     | 0.726                              | 1.292                              | 0.829                 |
| HER-2 Targeted        | Trastuzumab vs.<br>None                    | 0.797     | 0.551                              | 1.152                              | <b>0.004</b>          |
|                       | Trastuzumab+Other<br>vs. None              | 2.382     | 1.342                              | 4.231                              |                       |

All the variables which had univariate  $p$ -value significant ( $p < 0.05$ ) were entered into this multivariate model. The Odds Ratio (OR) is modeled for ovarian suppression (OS) = yes.  $OR > 1$  means more likely to get OS;  $OR < 1$  less likely to get OS; unk., unknown: number of patients in analysis who did not have documentation for this variable. All the unk. were excluded from this model building. The actual number in each group was  $N=426$  vs.  $N=1893$ . LN, lymph node

**Table S2:** Timing of Endocrine Therapy: Medical Ovarian Suppression and Bilateral Salpingo-oophorectomy Among the Three Endocrine Treatment Groups

|                                                                           | Group 2<br><b>Endocrine<br/>Treatment<br/>without<br/>OS<br/>(n=2018)</b> | Group 3<br><b>Endocrine<br/>Treatment<br/>with<br/>medical OS<br/>(n=282)</b> | Group 4<br><b>Endocrine<br/>Treatment<br/>with BSO<br/>(n=234)</b> |
|---------------------------------------------------------------------------|---------------------------------------------------------------------------|-------------------------------------------------------------------------------|--------------------------------------------------------------------|
| Months from Diagnosis to Start Endocrine treatment<br>(without OS or BSO) |                                                                           |                                                                               |                                                                    |
| Median (Mean)                                                             |                                                                           | 6.7(6.7)                                                                      |                                                                    |
| Range                                                                     |                                                                           | 0.2-42.3                                                                      |                                                                    |
| IQR                                                                       |                                                                           | 4.3-8.6                                                                       |                                                                    |
| Median (Mean)                                                             | 6.8(6.8)                                                                  | 6.3(6.5)                                                                      | 6.6(6.4)                                                           |
| Range                                                                     | 0.2-42.3                                                                  | 0.5-33.6                                                                      | 0.6-18.3                                                           |
| IQR                                                                       | 4.4-8.7                                                                   | 3.7-8.3                                                                       | 3.8-8.4                                                            |
| Missing start<br>date                                                     | 107                                                                       | 26                                                                            | 19                                                                 |
| Patients treated with <u>both</u> , endocrine treatment* and OS or<br>BSO | 0 (0%)                                                                    | 256                                                                           | 208                                                                |
| Months from Diagnosis to any type of OS                                   |                                                                           |                                                                               |                                                                    |
| Median (Mean)                                                             | -                                                                         | 12.4(19.7)                                                                    |                                                                    |
| Range                                                                     | -                                                                         | 0.76 - 94.0                                                                   |                                                                    |
| IQR                                                                       | -                                                                         | 6.4-28.4                                                                      |                                                                    |
| Months from Diagnosis to BSO                                              |                                                                           |                                                                               |                                                                    |
| Median (Mean)                                                             | -                                                                         |                                                                               | 22.9(27.2)                                                         |
| Range                                                                     | -                                                                         |                                                                               | 0.9-90.3                                                           |
| IQR                                                                       | -                                                                         |                                                                               | 13.5-37.7                                                          |
| Endocrine treatment* before medical (group 3) or<br>BSO (group 4)         | -                                                                         | 135(88.8%)                                                                    | 193(92.8%)                                                         |
| Endocrine treatment* started with medical OS or<br>BSO                    | -                                                                         | 119(80.4%)                                                                    | 4(1.9%)                                                            |
| Medical OS or BSO started before endocrine<br>treatment*                  | -                                                                         | 2(66.7%)                                                                      | 11(5.3%)                                                           |
| Months from Start of Endocrine treatment* to start of medical OS or BSO   |                                                                           |                                                                               |                                                                    |
| N                                                                         | -                                                                         | 135                                                                           | 193                                                                |
| Median (Mean)                                                             | -                                                                         | 13.6(19.8)                                                                    | 18.3(23.4)                                                         |
| Range                                                                     | -                                                                         | 0-89.8                                                                        | 0.9-88.2                                                           |
| IQR                                                                       | -                                                                         | 4-34                                                                          | 9.4-34.7                                                           |

\* in this context “endocrine treatment” refers to treatment with either tamoxifen or aromatase inhibitor. OS, ovarian suppression; BSO, bilateral salpingo-oophorectomy; IQR, interquartile range
